# Supplementary material for: A first principles study of CO2 adsorption on α-SiO2(001) surfaces
Source: Royal Society of Chemistry journal article supplement (doi:10.1039/c5cp02279g), 2015-01-01
Supplement: c5cp02279g1.pdf [file c5cp02279g1.pdf]

**Electronic Supplementary Information**

**for**

**A first principles study of CO<sub>2</sub> adsorption on  $\alpha$ -SiO<sub>2</sub>(001) surfaces**

Oleksandr I. Malyi<sup>1\*</sup>, Priyadarshini Thiyam<sup>2</sup>, Mathias Boström<sup>1</sup>, and Clas Persson<sup>1-3</sup>

1 – Centre for Materials Science and Nanotechnology, University of Oslo, P. O. Box 1048  
Blindern, NO-0316 Oslo, Norway

2 – Department of Materials Science and Engineering, Royal Institute of Technology, SE-100  
44 Stockholm, Sweden

3 – Department of Physics, University of Oslo, P. O. Box 1048 Blindern, NO-0316 Oslo,  
Norway

**Email:** [oleksandr.malyi@smn.uio.no](mailto:oleksandr.malyi@smn.uio.no) (O.I.M\*)

**Table S1.** Monkhorst-Pack grids used in this work

| system                          | type of calculations | size                   |
|---------------------------------|----------------------|------------------------|
| Bulk $\alpha$ -SiO <sub>2</sub> | “static” DFT         | 7×7×7                  |
| Unit cell slab                  | “static” DFT         | 7×7×1                  |
| 2×2 supercell slab              | “static” DFT         | 3×3×1                  |
| All systems                     | BOMD                 | single $\Gamma$ -point |

### Visualization

The visualization of computed structures was made by VESTA software.<sup>1</sup>

### Screening calculations

To find adsorption sites for CO<sub>2</sub> molecules, over 50 initial adsorption configurations for each surface (all initial configurations were generated based on a uniform grid) were screened. Then, a few lowest energy configurations were optimized with the final computational setup. To ensure that the screening methodology can provide reliable results, comparison of the binding energies for the screening and final “static” DFT setups was performed. The largest difference was computed to be 0.06 eV

To predict the lowest energy CO<sub>2</sub> configurations at reconstructed surfaces for higher CO<sub>2</sub> concentrations (monolayer coverage), BOMD simulations using the optB86b-vdW functional at 50 K were performed for randomly distributed molecules at the surfaces. During the simulations, 8 configurations (one configuration taken every 0.75 ps) for each surface were generated and further optimized using “static” DFT calculations. It should be noted that key BOMD simulations (e.g. generation of “dense” and reoptimized “dense” surfaces) were also performed using higher cutoff energy (400 eV) to confirm that the results were not affected by the computational setup.

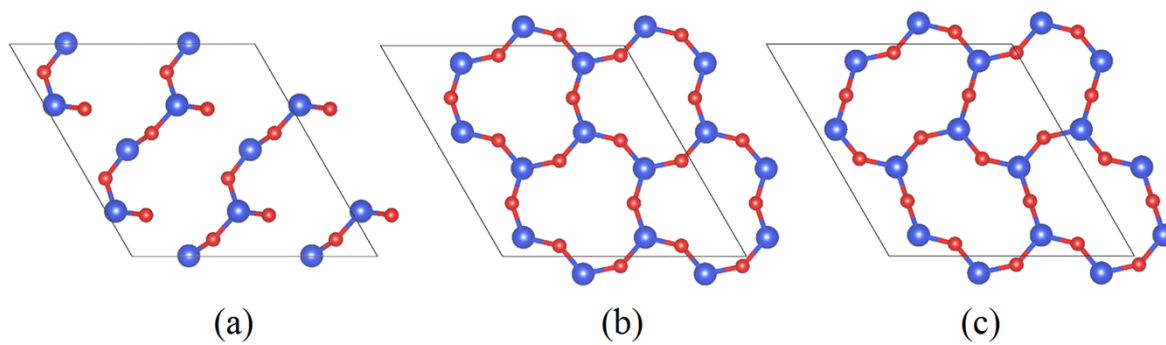

**Fig. S1** Top view of (a) cleaved, (b) “dense”, and (c) reoptimized “dense”  $\alpha$ -SiO<sub>2</sub>(001) surfaces.

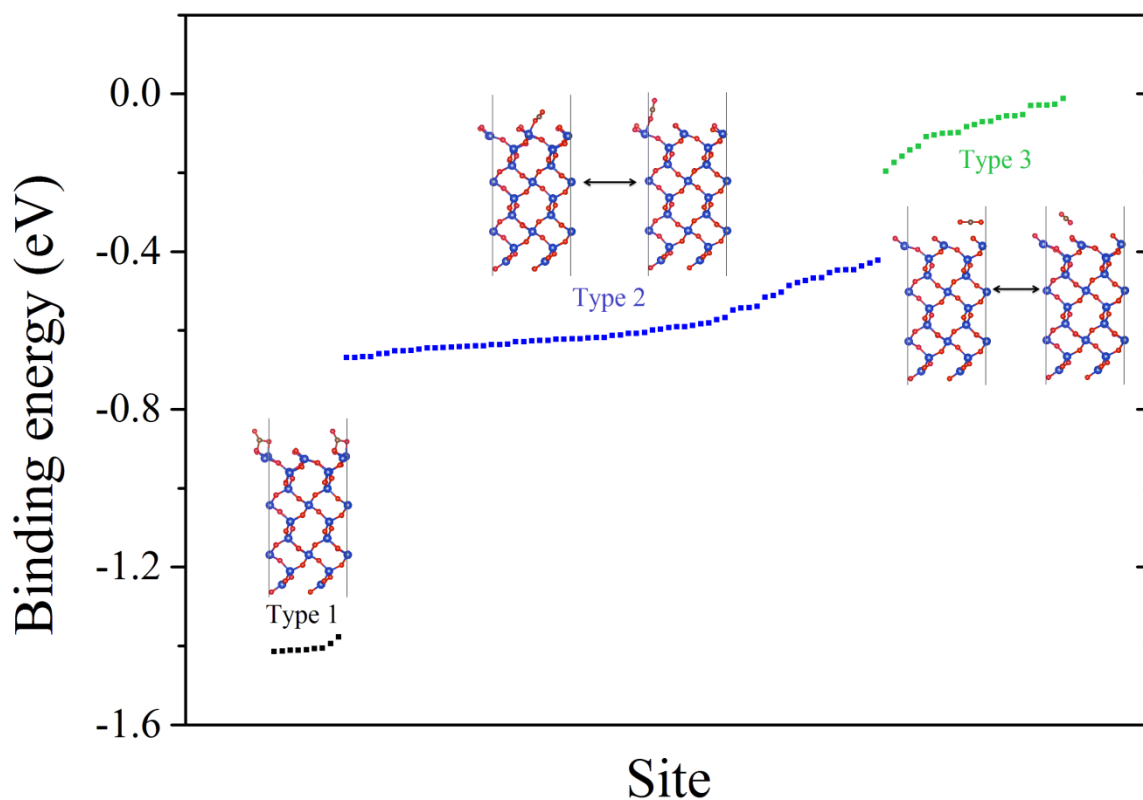

**Fig. S2.** Results for screening calculations for adsorption of single CO<sub>2</sub> molecule on cleaved  $\alpha$ -SiO<sub>2</sub>(001) surface. Each point corresponds to single calculation. For configurations of the Type 2 and Type 3, the lowest and highest energy configurations are shown. For the Type 1 configurations, the visual difference between different configurations is not significant and hence only one configuration is shown. Different binding energies come from the minor modifications of the configurations (e.g. change of distance to the surface, rotation of the molecule, etc.). For the final “*static*” calculations only the lowest energy structures of each type were used.

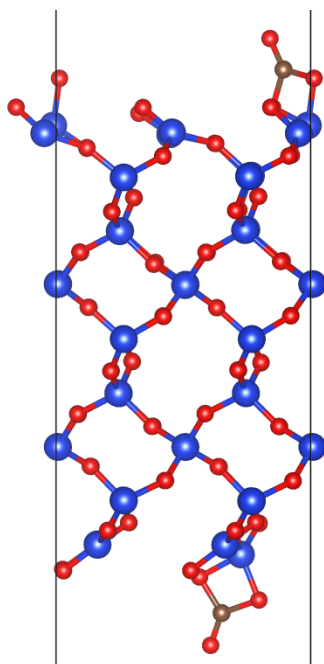

**Fig. S3** Lateral view of the system containing two CO<sub>2</sub> molecules adsorbed at CO3-1 configurations. The system was used for BOMD simulation for the search of reconstruction in CO<sub>2</sub>-α-SiO<sub>2</sub> system.

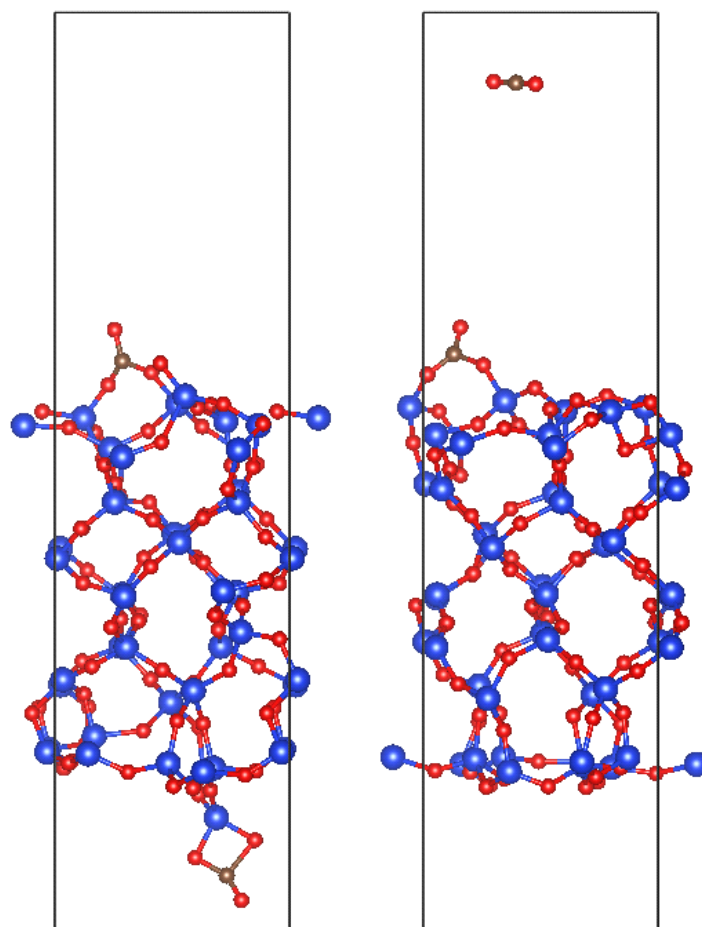

**Fig. S4.** Initial (left figure) and final (right figure) structures observed from BOMD simulations of CO3-1 stability for energy profile shown in Fig. 1e. During the BOMD simulation, one CO<sub>2</sub> molecule desorbs from the surface. The desorption of the second molecule was not observed.

#### References

1. K. Momma and F. Izumi, *J. Appl. Crystallogr.*, 2011, 44, 1272-1276.

## Structures

### dense surface (optB86b-vdW)

\_cell\_length\_a 9.80  
\_cell\_length\_b 9.80  
\_cell\_length\_c 28.089  
\_cell\_angle\_alpha 90  
\_cell\_angle\_beta 90  
\_cell\_angle\_gamma 120  
\_symmetry\_space\_group\_H-M 'P1'  
\_symmetry\_Int\_Tables\_number '1'  
\_symmetry\_cell\_setting 'triclinic'  
loop\_  
\_symmetry\_equiv\_pos\_as\_xyz  
x,y,z

### loop\_

\_atom\_site\_label  
\_atom\_site\_type\_symbol  
\_atom\_site\_occupancy  
\_atom\_site\_fract\_x  
\_atom\_site\_fract\_y  
\_atom\_site\_fract\_z  
\_atom\_site\_U\_iso\_or\_equiv  
O1 O 1.0000 0.06496 0.36891 0.32373 0.0000  
O2 O 1.0000 0.06496 0.86891 0.32373 0.0000  
O3 O 1.0000 0.56496 0.36891 0.32373 0.0000  
O4 O 1.0000 0.56496 0.86891 0.32373 0.0000  
O5 O 1.0000 0.19608 0.13115 0.27628 0.0000  
O6 O 1.0000 0.19608 0.63115 0.27628 0.0000  
O7 O 1.0000 0.69608 0.13115 0.27628 0.0000  
O8 O 1.0000 0.69608 0.63115 0.27628 0.0000  
O9 O 1.0000 0.36535 0.07051 0.34148 0.0000  
O10 O 1.0000 0.36535 0.57051 0.34148 0.0000  
O11 O 1.0000 0.86535 0.07051 0.34148 0.0000  
O12 O 1.0000 0.86535 0.57051 0.34148 0.0000  
O13 O 1.0000 0.29480 0.42951 0.25851 0.0000  
O14 O 1.0000 0.29480 0.92951 0.25851 0.0000  
O15 O 1.0000 0.79480 0.42951 0.25851 0.0000  
O16 O 1.0000 0.79480 0.92951 0.25851 0.0000  
O17 O 1.0000 0.15076 0.22014 0.38406 0.0000  
O18 O 1.0000 0.15076 0.72014 0.38406 0.0000  
O19 O 1.0000 0.65076 0.22014 0.38406 0.0000  
O20 O 1.0000 0.65076 0.72014 0.38406 0.0000  
O21 O 1.0000 0.43058 0.27989 0.21593 0.0000  
O22 O 1.0000 0.43058 0.77989 0.21593 0.0000  
O23 O 1.0000 0.93058 0.27989 0.21593 0.0000  
O24 O 1.0000 0.93058 0.77989 0.21593 0.0000  
O25 O 1.0000 0.42842 0.27533 0.41087 0.0000  
O26 O 1.0000 0.42842 0.77533 0.41087 0.0000  
O27 O 1.0000 0.92842 0.27533 0.41087 0.0000  
O28 O 1.0000 0.92842 0.77533 0.41087 0.0000  
O29 O 1.0000 0.15301 0.22461 0.18914 0.0000  
O30 O 1.0000 0.15301 0.72461 0.18914 0.0000  
O31 O 1.0000 0.65301 0.22461 0.18914 0.0000  
O32 O 1.0000 0.65301 0.72461 0.18914 0.0000  
O33 O 1.0000 0.29964 0.39900 0.46425 0.0000  
O34 O 1.0000 0.29964 0.89900 0.46425 0.0000  
O35 O 1.0000 0.79964 0.39900 0.46425 0.0000  
O36 O 1.0000 0.79964 0.89900 0.46425 0.0000  
O37 O 1.0000 0.40057 0.10097 0.13576 0.0000

|      |    |        |         |         |         |        |
|------|----|--------|---------|---------|---------|--------|
| O38  | O  | 1.0000 | 0.40057 | 0.60097 | 0.13576 | 0.0000 |
| O39  | O  | 1.0000 | 0.90057 | 0.10097 | 0.13576 | 0.0000 |
| O40  | O  | 1.0000 | 0.90057 | 0.60097 | 0.13576 | 0.0000 |
| O41  | O  | 1.0000 | 0.16762 | 0.09416 | 0.46495 | 0.0000 |
| O42  | O  | 1.0000 | 0.16762 | 0.59416 | 0.46495 | 0.0000 |
| O43  | O  | 1.0000 | 0.66762 | 0.09416 | 0.46495 | 0.0000 |
| O44  | O  | 1.0000 | 0.66762 | 0.59416 | 0.46495 | 0.0000 |
| O45  | O  | 1.0000 | 0.07345 | 0.40580 | 0.13505 | 0.0000 |
| O46  | O  | 1.0000 | 0.07345 | 0.90580 | 0.13505 | 0.0000 |
| O47  | O  | 1.0000 | 0.57345 | 0.40580 | 0.13505 | 0.0000 |
| O48  | O  | 1.0000 | 0.57345 | 0.90580 | 0.13505 | 0.0000 |
| O49  | O  | 1.0000 | 0.18183 | 0.24255 | 0.54577 | 0.0000 |
| O50  | O  | 1.0000 | 0.18183 | 0.74255 | 0.54577 | 0.0000 |
| O51  | O  | 1.0000 | 0.68183 | 0.24255 | 0.54577 | 0.0000 |
| O52  | O  | 1.0000 | 0.68183 | 0.74255 | 0.54577 | 0.0000 |
| O53  | O  | 1.0000 | 0.43923 | 0.25744 | 0.05423 | 0.0000 |
| O54  | O  | 1.0000 | 0.43923 | 0.75744 | 0.05423 | 0.0000 |
| O55  | O  | 1.0000 | 0.93923 | 0.25744 | 0.05423 | 0.0000 |
| O56  | O  | 1.0000 | 0.93923 | 0.75744 | 0.05423 | 0.0000 |
| O57  | O  | 1.0000 | 0.48771 | 0.43277 | 0.53813 | 0.0000 |
| O58  | O  | 1.0000 | 0.48771 | 0.93277 | 0.53813 | 0.0000 |
| O59  | O  | 1.0000 | 0.98771 | 0.43277 | 0.53813 | 0.0000 |
| O60  | O  | 1.0000 | 0.98771 | 0.93277 | 0.53813 | 0.0000 |
| O61  | O  | 1.0000 | 0.05489 | 0.06723 | 0.06189 | 0.0000 |
| O62  | O  | 1.0000 | 0.05489 | 0.56723 | 0.06189 | 0.0000 |
| O63  | O  | 1.0000 | 0.55489 | 0.06723 | 0.06189 | 0.0000 |
| O64  | O  | 1.0000 | 0.55489 | 0.56723 | 0.06189 | 0.0000 |
| O65  | O  | 1.0000 | 0.29650 | 0.05062 | 0.54250 | 0.0000 |
| O66  | O  | 1.0000 | 0.29650 | 0.55062 | 0.54250 | 0.0000 |
| O67  | O  | 1.0000 | 0.79650 | 0.05062 | 0.54250 | 0.0000 |
| O68  | O  | 1.0000 | 0.79650 | 0.55062 | 0.54250 | 0.0000 |
| O69  | O  | 1.0000 | 0.24584 | 0.44939 | 0.05749 | 0.0000 |
| O70  | O  | 1.0000 | 0.24584 | 0.94939 | 0.05749 | 0.0000 |
| O71  | O  | 1.0000 | 0.74584 | 0.44939 | 0.05749 | 0.0000 |
| O72  | O  | 1.0000 | 0.74584 | 0.94939 | 0.05749 | 0.0000 |
| Si1  | Si | 1.0000 | 0.23103 | 0.00002 | 0.30000 | 0.0000 |
| Si2  | Si | 1.0000 | 0.23103 | 0.50002 | 0.30000 | 0.0000 |
| Si3  | Si | 1.0000 | 0.73103 | 0.00002 | 0.30000 | 0.0000 |
| Si4  | Si | 1.0000 | 0.73103 | 0.50002 | 0.30000 | 0.0000 |
| Si5  | Si | 1.0000 | 0.00152 | 0.23366 | 0.36488 | 0.0000 |
| Si6  | Si | 1.0000 | 0.00152 | 0.73366 | 0.36488 | 0.0000 |
| Si7  | Si | 1.0000 | 0.50152 | 0.23366 | 0.36488 | 0.0000 |
| Si8  | Si | 1.0000 | 0.50152 | 0.73366 | 0.36488 | 0.0000 |
| Si9  | Si | 1.0000 | 0.26783 | 0.26636 | 0.23512 | 0.0000 |
| Si10 | Si | 1.0000 | 0.26783 | 0.76636 | 0.23512 | 0.0000 |
| Si11 | Si | 1.0000 | 0.76783 | 0.26636 | 0.23512 | 0.0000 |
| Si12 | Si | 1.0000 | 0.76783 | 0.76636 | 0.23512 | 0.0000 |
| Si13 | Si | 1.0000 | 0.26049 | 0.24759 | 0.43040 | 0.0000 |
| Si14 | Si | 1.0000 | 0.26049 | 0.74759 | 0.43040 | 0.0000 |
| Si15 | Si | 1.0000 | 0.76049 | 0.24759 | 0.43040 | 0.0000 |
| Si16 | Si | 1.0000 | 0.76049 | 0.74759 | 0.43040 | 0.0000 |
| Si17 | Si | 1.0000 | 0.01285 | 0.25239 | 0.16960 | 0.0000 |
| Si18 | Si | 1.0000 | 0.01285 | 0.75239 | 0.16960 | 0.0000 |
| Si19 | Si | 1.0000 | 0.51285 | 0.25239 | 0.16960 | 0.0000 |
| Si20 | Si | 1.0000 | 0.51285 | 0.75239 | 0.16960 | 0.0000 |
| Si21 | Si | 1.0000 | 0.31708 | 0.40740 | 0.52266 | 0.0000 |
| Si22 | Si | 1.0000 | 0.31708 | 0.90740 | 0.52266 | 0.0000 |
| Si23 | Si | 1.0000 | 0.81708 | 0.40740 | 0.52266 | 0.0000 |
| Si24 | Si | 1.0000 | 0.81708 | 0.90740 | 0.52266 | 0.0000 |
| Si25 | Si | 1.0000 | 0.40963 | 0.09259 | 0.07734 | 0.0000 |



|      |    |        |         |         |         |        |
|------|----|--------|---------|---------|---------|--------|
| Si26 | Si | 1.0000 | 0.40963 | 0.59259 | 0.07734 | 0.0000 |
| Si27 | Si | 1.0000 | 0.90963 | 0.09259 | 0.07734 | 0.0000 |
| Si28 | Si | 1.0000 | 0.90963 | 0.59259 | 0.07734 | 0.0000 |
| Si29 | Si | 1.0000 | 0.15686 | 0.07925 | 0.52306 | 0.0000 |
| Si30 | Si | 1.0000 | 0.15686 | 0.57925 | 0.52306 | 0.0000 |
| Si31 | Si | 1.0000 | 0.65686 | 0.07925 | 0.52306 | 0.0000 |
| Si32 | Si | 1.0000 | 0.65686 | 0.57925 | 0.52306 | 0.0000 |
| Si33 | Si | 1.0000 | 0.07757 | 0.42074 | 0.07694 | 0.0000 |
| Si34 | Si | 1.0000 | 0.07757 | 0.92074 | 0.07694 | 0.0000 |
| Si35 | Si | 1.0000 | 0.57757 | 0.42074 | 0.07694 | 0.0000 |
| Si36 | Si | 1.0000 | 0.57757 | 0.92074 | 0.07694 | 0.0000 |

**reoptimized dense (optB86b-vdW)**

\_cell\_length\_a 9.80  
\_cell\_length\_b 9.80  
\_cell\_length\_c 28.089  
\_cell\_angle\_alpha 90  
\_cell\_angle\_beta 90  
\_cell\_angle\_gamma 120  
\_symmetry\_space\_group\_H-M 'P1'  
\_symmetry\_Int\_Tables\_number '1'  
\_symmetry\_cell\_setting 'triclinic'  
loop\_  
\_symmetry\_equiv\_pos\_as\_xyz  
x,y,z

loop\_

\_atom\_site\_label  
\_atom\_site\_type\_symbol  
\_atom\_site\_occupancy  
\_atom\_site\_fract\_x  
\_atom\_site\_fract\_y  
\_atom\_site\_fract\_z  
\_atom\_site\_U\_iso\_or\_equiv  
O1 O 1.0000 0.11660 0.37374 0.33124 0.0000  
O2 O 1.0000 0.05588 0.90730 0.32638 0.0000  
O3 O 1.0000 0.61671 0.39237 0.33533 0.0000  
O4 O 1.0000 0.54921 0.90017 0.32497 0.0000  
O5 O 1.0000 0.17714 0.10191 0.25630 0.0000  
O6 O 1.0000 0.23451 0.60146 0.27033 0.0000  
O7 O 1.0000 0.68557 0.07774 0.25162 0.0000  
O8 O 1.0000 0.73496 0.57731 0.26202 0.0000  
O9 O 1.0000 0.36450 0.10818 0.32807 0.0000  
O10 O 1.0000 0.41616 0.59703 0.34230 0.0000  
O11 O 1.0000 0.85864 0.09383 0.32907 0.0000  
O12 O 1.0000 0.92091 0.60329 0.33777 0.0000  
O13 O 1.0000 0.34848 0.40538 0.27188 0.0000  
O14 O 1.0000 0.26106 0.88360 0.26668 0.0000  
O15 O 1.0000 0.82915 0.37240 0.27833 0.0000  
O16 O 1.0000 0.75397 0.85366 0.27305 0.0000  
O17 O 1.0000 0.06979 0.16603 0.39749 0.0000  
O18 O 1.0000 0.07710 0.80158 0.41160 0.0000  
O19 O 1.0000 0.57340 0.17086 0.39656 0.0000  
O20 O 1.0000 0.58301 0.80921 0.41138 0.0000  
O21 O 1.0000 0.45233 0.25638 0.21536 0.0000  
O22 O 1.0000 0.40398 0.79930 0.20229 0.0000  
O23 O 1.0000 0.96281 0.26948 0.21588 0.0000  
O24 O 1.0000 0.90617 0.80366 0.20199 0.0000  
O25 O 1.0000 0.38456 0.29750 0.39767 0.0000  
O26 O 1.0000 0.30287 0.75724 0.38390 0.0000  
O27 O 1.0000 0.88750 0.29898 0.39471 0.0000  
O28 O 1.0000 0.80198 0.75403 0.38293 0.0000  
O29 O 1.0000 0.22895 0.31087 0.18508 0.0000  
O30 O 1.0000 0.08831 0.67029 0.20335 0.0000  
O31 O 1.0000 0.72544 0.30482 0.18828 0.0000  
O32 O 1.0000 0.59065 0.67183 0.20149 0.0000  
O33 O 1.0000 0.24299 0.38165 0.46292 0.0000  
O34 O 1.0000 0.34114 0.90188 0.46662 0.0000  
O35 O 1.0000 0.75181 0.38653 0.46136 0.0000  
O36 O 1.0000 0.84480 0.89893 0.46623 0.0000  
O37 O 1.0000 0.48427 0.10995 0.13610 0.0000  
O38 O 1.0000 0.38392 0.60920 0.13189 0.0000

|      |    |        |         |         |         |        |
|------|----|--------|---------|---------|---------|--------|
| O39  | O  | 1.0000 | 0.97943 | 0.11314 | 0.13640 | 0.0000 |
| O40  | O  | 1.0000 | 0.88592 | 0.60825 | 0.13260 | 0.0000 |
| O41  | O  | 1.0000 | 0.21364 | 0.10269 | 0.46731 | 0.0000 |
| O42  | O  | 1.0000 | 0.12532 | 0.60691 | 0.46328 | 0.0000 |
| O43  | O  | 1.0000 | 0.71922 | 0.10586 | 0.46547 | 0.0000 |
| O44  | O  | 1.0000 | 0.62176 | 0.60667 | 0.46209 | 0.0000 |
| O45  | O  | 1.0000 | 0.05838 | 0.40773 | 0.13166 | 0.0000 |
| O46  | O  | 1.0000 | 0.13522 | 0.88786 | 0.13755 | 0.0000 |
| O47  | O  | 1.0000 | 0.55961 | 0.40377 | 0.13298 | 0.0000 |
| O48  | O  | 1.0000 | 0.63201 | 0.88844 | 0.13659 | 0.0000 |
| O49  | O  | 1.0000 | 0.22834 | 0.24968 | 0.54822 | 0.0000 |
| O50  | O  | 1.0000 | 0.22867 | 0.74564 | 0.54795 | 0.0000 |
| O51  | O  | 1.0000 | 0.73102 | 0.25100 | 0.54640 | 0.0000 |
| O52  | O  | 1.0000 | 0.72651 | 0.74337 | 0.54715 | 0.0000 |
| O53  | O  | 1.0000 | 0.51632 | 0.24878 | 0.05151 | 0.0000 |
| O54  | O  | 1.0000 | 0.52009 | 0.75310 | 0.05114 | 0.0000 |
| O55  | O  | 1.0000 | 0.01354 | 0.24804 | 0.05107 | 0.0000 |
| O56  | O  | 1.0000 | 0.01883 | 0.75663 | 0.05206 | 0.0000 |
| O57  | O  | 1.0000 | 0.41928 | 0.55687 | 0.53407 | 0.0000 |
| O58  | O  | 1.0000 | 0.53871 | 0.94030 | 0.53800 | 0.0000 |
| O59  | O  | 1.0000 | 0.92033 | 0.55936 | 0.53407 | 0.0000 |
| O60  | O  | 1.0000 | 0.03707 | 0.93792 | 0.53981 | 0.0000 |
| O61  | O  | 1.0000 | 0.13717 | 0.06400 | 0.06599 | 0.0000 |
| O62  | O  | 1.0000 | 0.90079 | 0.44540 | 0.05953 | 0.0000 |
| O63  | O  | 1.0000 | 0.63607 | 0.06080 | 0.06389 | 0.0000 |
| O64  | O  | 1.0000 | 0.39964 | 0.44162 | 0.06085 | 0.0000 |
| O65  | O  | 1.0000 | 0.34554 | 0.05576 | 0.54409 | 0.0000 |
| O66  | O  | 1.0000 | 0.10847 | 0.43689 | 0.53762 | 0.0000 |
| O67  | O  | 1.0000 | 0.84563 | 0.05467 | 0.54277 | 0.0000 |
| O68  | O  | 1.0000 | 0.60852 | 0.43520 | 0.53537 | 0.0000 |
| O69  | O  | 1.0000 | 0.20892 | 0.55836 | 0.05397 | 0.0000 |
| O70  | O  | 1.0000 | 0.32526 | 0.94051 | 0.06273 | 0.0000 |
| O71  | O  | 1.0000 | 0.70789 | 0.55983 | 0.05570 | 0.0000 |
| O72  | O  | 1.0000 | 0.82599 | 0.93947 | 0.06293 | 0.0000 |
| Si1  | Si | 1.0000 | 0.21453 | 0.99891 | 0.29447 | 0.0000 |
| Si2  | Si | 1.0000 | 0.27748 | 0.49355 | 0.30381 | 0.0000 |
| Si3  | Si | 1.0000 | 0.71257 | 0.98174 | 0.29469 | 0.0000 |
| Si4  | Si | 1.0000 | 0.77437 | 0.48657 | 0.30336 | 0.0000 |
| Si5  | Si | 1.0000 | 0.98277 | 0.23385 | 0.36304 | 0.0000 |
| Si6  | Si | 1.0000 | 0.96615 | 0.76739 | 0.36506 | 0.0000 |
| Si7  | Si | 1.0000 | 0.48429 | 0.24215 | 0.36445 | 0.0000 |
| Si8  | Si | 1.0000 | 0.46540 | 0.76714 | 0.36614 | 0.0000 |
| Si9  | Si | 1.0000 | 0.30029 | 0.27001 | 0.23167 | 0.0000 |
| Si10 | Si | 1.0000 | 0.24815 | 0.73909 | 0.23566 | 0.0000 |
| Si11 | Si | 1.0000 | 0.79875 | 0.25783 | 0.23305 | 0.0000 |
| Si12 | Si | 1.0000 | 0.74661 | 0.72780 | 0.23453 | 0.0000 |
| Si13 | Si | 1.0000 | 0.22778 | 0.23671 | 0.43021 | 0.0000 |
| Si14 | Si | 1.0000 | 0.21302 | 0.76713 | 0.43103 | 0.0000 |
| Si15 | Si | 1.0000 | 0.73331 | 0.24035 | 0.42849 | 0.0000 |
| Si16 | Si | 1.0000 | 0.71474 | 0.76744 | 0.43026 | 0.0000 |
| Si17 | Si | 1.0000 | 0.05615 | 0.27583 | 0.16758 | 0.0000 |
| Si18 | Si | 1.0000 | 0.00382 | 0.74270 | 0.16996 | 0.0000 |
| Si19 | Si | 1.0000 | 0.55478 | 0.26955 | 0.16853 | 0.0000 |
| Si20 | Si | 1.0000 | 0.50266 | 0.74286 | 0.16924 | 0.0000 |
| Si21 | Si | 1.0000 | 0.24853 | 0.40494 | 0.52084 | 0.0000 |
| Si22 | Si | 1.0000 | 0.36475 | 0.90934 | 0.52458 | 0.0000 |
| Si23 | Si | 1.0000 | 0.75162 | 0.40690 | 0.51936 | 0.0000 |
| Si24 | Si | 1.0000 | 0.86451 | 0.90695 | 0.52435 | 0.0000 |
| Si25 | Si | 1.0000 | 0.49320 | 0.09149 | 0.07827 | 0.0000 |
| Si26 | Si | 1.0000 | 0.37847 | 0.59224 | 0.07396 | 0.0000 |

|      |    |        |         |         |         |        |
|------|----|--------|---------|---------|---------|--------|
| Si27 | Si | 1.0000 | 0.99177 | 0.09261 | 0.07880 | 0.0000 |
| Si28 | Si | 1.0000 | 0.87872 | 0.59418 | 0.07454 | 0.0000 |
| Si29 | Si | 1.0000 | 0.20764 | 0.08823 | 0.52536 | 0.0000 |
| Si30 | Si | 1.0000 | 0.09445 | 0.58869 | 0.52102 | 0.0000 |
| Si31 | Si | 1.0000 | 0.70989 | 0.08947 | 0.52351 | 0.0000 |
| Si32 | Si | 1.0000 | 0.59272 | 0.58694 | 0.51986 | 0.0000 |
| Si33 | Si | 1.0000 | 0.04257 | 0.41329 | 0.07360 | 0.0000 |
| Si34 | Si | 1.0000 | 0.15427 | 0.91126 | 0.07957 | 0.0000 |
| Si35 | Si | 1.0000 | 0.54294 | 0.41190 | 0.07500 | 0.0000 |
| Si36 | Si | 1.0000 | 0.65359 | 0.90912 | 0.07861 | 0.0000 |

**d-CO2 (optB86b-vdW)**

\_cell\_length\_a 9.80  
\_cell\_length\_b 9.80  
\_cell\_length\_c 34  
\_cell\_angle\_alpha 90  
\_cell\_angle\_beta 90  
\_cell\_angle\_gamma 120  
\_symmetry\_space\_group\_H-M 'P1'  
\_symmetry\_Int\_Tables\_number '1'  
\_symmetry\_cell\_setting 'triclinic'  
loop\_  
\_symmetry\_equiv\_pos\_as\_xyz  
x,y,z

loop\_

\_atom\_site\_label  
\_atom\_site\_type\_symbol  
\_atom\_site\_occupancy  
\_atom\_site\_fract\_x  
\_atom\_site\_fract\_y  
\_atom\_site\_fract\_z  
\_atom\_site\_U\_iso\_or\_equiv  
Si1 Si 1.0000 0.07711 0.42140 0.06277 0.0000  
Si2 Si 1.0000 0.07731 0.92148 0.06278 0.0000  
Si3 Si 1.0000 0.57714 0.42147 0.06266 0.0000  
Si4 Si 1.0000 0.57723 0.92140 0.06272 0.0000  
Si5 Si 1.0000 0.40911 0.59315 0.06301 0.0000  
Si6 Si 1.0000 0.40929 0.09321 0.06306 0.0000  
Si7 Si 1.0000 0.90921 0.09314 0.06313 0.0000  
Si8 Si 1.0000 0.90914 0.59323 0.06313 0.0000  
Si9 Si 1.0000 0.01361 0.25296 0.13920 0.0000  
Si10 Si 1.0000 0.01351 0.75298 0.13921 0.0000  
Si11 Si 1.0000 0.51353 0.75281 0.13911 0.0000  
Si12 Si 1.0000 0.51373 0.25327 0.13910 0.0000  
Si13 Si 1.0000 0.26904 0.26742 0.19300 0.0000  
Si14 Si 1.0000 0.26889 0.76722 0.19301 0.0000  
Si15 Si 1.0000 0.76871 0.26724 0.19297 0.0000  
Si16 Si 1.0000 0.76848 0.76704 0.19300 0.0000  
Si17 Si 1.0000 0.23124 0.50052 0.24639 0.0000  
Si18 Si 1.0000 0.73077 0.50028 0.24637 0.0000  
Si19 Si 1.0000 0.73015 0.00018 0.24634 0.0000  
Si20 Si 1.0000 0.23127 0.00046 0.24630 0.0000  
Si21 Si 1.0000 0.50163 0.23374 0.29974 0.0000  
Si22 Si 1.0000 0.00158 0.23351 0.29962 0.0000  
Si23 Si 1.0000 0.00189 0.73385 0.29961 0.0000  
Si24 Si 1.0000 0.50153 0.73392 0.29982 0.0000  
Si25 Si 1.0000 0.26026 0.24759 0.35347 0.0000  
Si26 Si 1.0000 0.26016 0.74764 0.35364 0.0000  
Si27 Si 1.0000 0.76119 0.24818 0.35354 0.0000  
Si28 Si 1.0000 0.76170 0.74902 0.35351 0.0000  
Si29 Si 1.0000 0.81656 0.90752 0.42976 0.0000  
Si30 Si 1.0000 0.81608 0.40736 0.42971 0.0000  
Si31 Si 1.0000 0.31618 0.90720 0.42969 0.0000  
Si32 Si 1.0000 0.31585 0.40754 0.42942 0.0000  
Si33 Si 1.0000 0.15575 0.57927 0.43014 0.0000  
Si34 Si 1.0000 0.65616 0.07869 0.42993 0.0000  
Si35 Si 1.0000 0.15631 0.07935 0.42998 0.0000  
Si36 Si 1.0000 0.65615 0.57930 0.42983 0.0000  
O1 O 1.0000 0.43879 0.25802 0.04398 0.0000  
O2 O 1.0000 0.43874 0.75812 0.04400 0.0000

O3 O 1.0000 0.93876 0.75816 0.04409 0.0000  
O4 O 1.0000 0.93861 0.25801 0.04410 0.0000  
O5 O 1.0000 0.74547 0.45014 0.04664 0.0000  
O6 O 1.0000 0.24548 0.95002 0.04667 0.0000  
O7 O 1.0000 0.24527 0.45001 0.04663 0.0000  
O8 O 1.0000 0.74551 0.94997 0.04668 0.0000  
O9 O 1.0000 0.05460 0.06796 0.05038 0.0000  
O10 O 1.0000 0.55458 0.06789 0.05030 0.0000  
O11 O 1.0000 0.05443 0.56789 0.05038 0.0000  
O12 O 1.0000 0.55433 0.56781 0.05019 0.0000  
O13 O 1.0000 0.07337 0.40648 0.11076 0.0000  
O14 O 1.0000 0.07357 0.90653 0.11077 0.0000  
O15 O 1.0000 0.57321 0.40671 0.11065 0.0000  
O16 O 1.0000 0.57331 0.90643 0.11071 0.0000  
O17 O 1.0000 0.90042 0.10143 0.11140 0.0000  
O18 O 1.0000 0.40040 0.60140 0.11128 0.0000  
O19 O 1.0000 0.40056 0.10167 0.11132 0.0000  
O20 O 1.0000 0.90026 0.60152 0.11139 0.0000  
O21 O 1.0000 0.65474 0.22594 0.15482 0.0000  
O22 O 1.0000 0.15411 0.72516 0.15500 0.0000  
O23 O 1.0000 0.15450 0.22552 0.15495 0.0000  
O24 O 1.0000 0.65428 0.72514 0.15487 0.0000  
O25 O 1.0000 0.43210 0.28063 0.17753 0.0000  
O26 O 1.0000 0.93176 0.78055 0.17759 0.0000  
O27 O 1.0000 0.43177 0.78011 0.17752 0.0000  
O28 O 1.0000 0.93181 0.28023 0.17761 0.0000  
O29 O 1.0000 0.29603 0.93094 0.21201 0.0000  
O30 O 1.0000 0.29580 0.43087 0.21208 0.0000  
O31 O 1.0000 0.79552 0.43061 0.21212 0.0000  
O32 O 1.0000 0.79460 0.93022 0.21209 0.0000  
O33 O 1.0000 0.19650 0.13212 0.22697 0.0000  
O34 O 1.0000 0.19648 0.63220 0.22706 0.0000  
O35 O 1.0000 0.69550 0.13174 0.22689 0.0000  
O36 O 1.0000 0.69590 0.63174 0.22696 0.0000  
O37 O 1.0000 0.06470 0.36864 0.26562 0.0000  
O38 O 1.0000 0.56429 0.36859 0.26567 0.0000  
O39 O 1.0000 0.56373 0.86888 0.26576 0.0000  
O40 O 1.0000 0.06471 0.86839 0.26547 0.0000  
O41 O 1.0000 0.86461 0.57024 0.28075 0.0000  
O42 O 1.0000 0.36491 0.07014 0.28074 0.0000  
O43 O 1.0000 0.36509 0.57022 0.28078 0.0000  
O44 O 1.0000 0.86433 0.07025 0.28063 0.0000  
O45 O 1.0000 0.15131 0.72008 0.31517 0.0000  
O46 O 1.0000 0.65149 0.22063 0.31525 0.0000  
O47 O 1.0000 0.65190 0.72154 0.31523 0.0000  
O48 O 1.0000 0.15081 0.21918 0.31508 0.0000  
O49 O 1.0000 0.42870 0.77544 0.33791 0.0000  
O50 O 1.0000 0.92956 0.27626 0.33765 0.0000  
O51 O 1.0000 0.42900 0.27600 0.33774 0.0000  
O52 O 1.0000 0.93004 0.77721 0.33756 0.0000  
O53 O 1.0000 0.29712 0.39887 0.38118 0.0000  
O54 O 1.0000 0.79996 0.90010 0.38148 0.0000  
O55 O 1.0000 0.79919 0.39927 0.38147 0.0000  
O56 O 1.0000 0.29800 0.89908 0.38144 0.0000  
O57 O 1.0000 0.16632 0.59428 0.38213 0.0000  
O58 O 1.0000 0.66813 0.09464 0.38198 0.0000  
O59 O 1.0000 0.16752 0.09418 0.38201 0.0000  
O60 O 1.0000 0.66887 0.59521 0.38186 0.0000  
O61 O 1.0000 0.48661 0.43221 0.44152 0.0000  
O62 O 1.0000 0.98656 0.43265 0.44258 0.0000

|     |   |        |         |         |         |        |
|-----|---|--------|---------|---------|---------|--------|
| O63 | O | 1.0000 | 0.48687 | 0.93180 | 0.44190 | 0.0000 |
| O64 | O | 1.0000 | 0.98728 | 0.93285 | 0.44250 | 0.0000 |
| O65 | O | 1.0000 | 0.29619 | 0.05094 | 0.44619 | 0.0000 |
| O66 | O | 1.0000 | 0.29552 | 0.55057 | 0.44604 | 0.0000 |
| O67 | O | 1.0000 | 0.79504 | 0.55005 | 0.44621 | 0.0000 |
| O68 | O | 1.0000 | 0.79586 | 0.05064 | 0.44621 | 0.0000 |
| O69 | O | 1.0000 | 0.18127 | 0.24264 | 0.44871 | 0.0000 |
| O70 | O | 1.0000 | 0.18076 | 0.74267 | 0.44885 | 0.0000 |
| O71 | O | 1.0000 | 0.68092 | 0.74244 | 0.44863 | 0.0000 |
| O72 | O | 1.0000 | 0.68049 | 0.24206 | 0.44874 | 0.0000 |
| O73 | O | 1.0000 | 0.48092 | 0.06993 | 0.52620 | 0.0000 |
| O74 | O | 1.0000 | 0.50548 | 0.32121 | 0.52507 | 0.0000 |
| C1  | C | 1.0000 | 0.49327 | 0.19564 | 0.52545 | 0.0000 |

**d-CO2-f (optB86b-vdW)**

\_cell\_length\_a 9.80  
\_cell\_length\_b 9.80  
\_cell\_length\_c 34  
\_cell\_angle\_alpha 90  
\_cell\_angle\_beta 90  
\_cell\_angle\_gamma 120  
\_symmetry\_space\_group\_H-M 'P1'  
\_symmetry\_Int\_Tables\_number '1'  
\_symmetry\_cell\_setting 'triclinic'  
loop\_  
\_symmetry\_equiv\_pos\_as\_xyz  
x,y,z

loop\_

\_atom\_site\_label  
\_atom\_site\_type\_symbol  
\_atom\_site\_occupancy  
\_atom\_site\_fract\_x  
\_atom\_site\_fract\_y  
\_atom\_site\_fract\_z  
\_atom\_site\_U\_iso\_or\_equiv  
O1 O 1.0000 0.65863 0.77857 0.96632 0.0000  
O2 O 1.0000 0.79964 0.64286 0.96252 0.0000  
O3 O 1.0000 0.39045 0.89395 0.96598 0.0000  
O4 O 1.0000 0.19958 0.62473 0.96842 0.0000  
O5 O 1.0000 0.79955 0.19168 0.96234 0.0000  
O6 O 1.0000 0.60196 0.26085 0.96501 0.0000  
O7 O 1.0000 0.38888 0.41667 0.96693 0.0000  
O8 O 1.0000 0.20489 0.14534 0.96877 0.0000  
O9 O 1.0000 0.49663 0.10478 0.52903 0.0000  
O10 O 1.0000 0.41487 0.29309 0.52699 0.0000  
O11 O 1.0000 0.91331 0.29258 0.52702 0.0000  
O12 O 1.0000 0.99660 0.10546 0.52914 0.0000  
O13 O 1.0000 0.35597 0.69647 0.52977 0.0000  
O14 O 1.0000 0.62886 0.87464 0.52948 0.0000  
O15 O 1.0000 0.12886 0.87567 0.52961 0.0000  
O16 O 1.0000 0.85632 0.69598 0.52979 0.0000  
O17 O 1.0000 0.06731 0.36745 0.26736 0.0000  
O18 O 1.0000 0.06609 0.86747 0.26653 0.0000  
O19 O 1.0000 0.56581 0.36780 0.26741 0.0000  
O20 O 1.0000 0.56527 0.86744 0.26648 0.0000  
O21 O 1.0000 0.19845 0.13040 0.22798 0.0000  
O22 O 1.0000 0.19887 0.63044 0.22860 0.0000  
O23 O 1.0000 0.69706 0.13058 0.22787 0.0000  
O24 O 1.0000 0.69632 0.63042 0.22830 0.0000  
O25 O 1.0000 0.36721 0.06802 0.28148 0.0000  
O26 O 1.0000 0.36777 0.56904 0.28229 0.0000  
O27 O 1.0000 0.86610 0.06854 0.28150 0.0000  
O28 O 1.0000 0.86614 0.56988 0.28215 0.0000  
O29 O 1.0000 0.29831 0.42926 0.21365 0.0000  
O30 O 1.0000 0.29680 0.92832 0.21292 0.0000  
O31 O 1.0000 0.79636 0.42964 0.21366 0.0000  
O32 O 1.0000 0.79635 0.92916 0.21298 0.0000  
O33 O 1.0000 0.15198 0.21523 0.31630 0.0000  
O34 O 1.0000 0.15422 0.72122 0.31625 0.0000  
O35 O 1.0000 0.65294 0.21699 0.31621 0.0000  
O36 O 1.0000 0.65550 0.72323 0.31629 0.0000  
O37 O 1.0000 0.43414 0.27930 0.17858 0.0000  
O38 O 1.0000 0.43252 0.77711 0.17850 0.0000



|      |    |        |         |         |         |        |
|------|----|--------|---------|---------|---------|--------|
| O39  | O  | 1.0000 | 0.93501 | 0.28170 | 0.17922 | 0.0000 |
| O40  | O  | 1.0000 | 0.93262 | 0.77770 | 0.17909 | 0.0000 |
| O41  | O  | 1.0000 | 0.42939 | 0.27012 | 0.33925 | 0.0000 |
| O42  | O  | 1.0000 | 0.43207 | 0.77696 | 0.33881 | 0.0000 |
| O43  | O  | 1.0000 | 0.93014 | 0.27127 | 0.33916 | 0.0000 |
| O44  | O  | 1.0000 | 0.93274 | 0.77750 | 0.33887 | 0.0000 |
| O45  | O  | 1.0000 | 0.15658 | 0.22516 | 0.15626 | 0.0000 |
| O46  | O  | 1.0000 | 0.15381 | 0.72033 | 0.15649 | 0.0000 |
| O47  | O  | 1.0000 | 0.65809 | 0.22669 | 0.15587 | 0.0000 |
| O48  | O  | 1.0000 | 0.65614 | 0.72404 | 0.15590 | 0.0000 |
| O49  | O  | 1.0000 | 0.29950 | 0.39632 | 0.38208 | 0.0000 |
| O50  | O  | 1.0000 | 0.30159 | 0.89915 | 0.38277 | 0.0000 |
| O51  | O  | 1.0000 | 0.80018 | 0.39714 | 0.38209 | 0.0000 |
| O52  | O  | 1.0000 | 0.80263 | 0.89996 | 0.38291 | 0.0000 |
| O53  | O  | 1.0000 | 0.40390 | 0.10056 | 0.11230 | 0.0000 |
| O54  | O  | 1.0000 | 0.40335 | 0.59976 | 0.11205 | 0.0000 |
| O55  | O  | 1.0000 | 0.90087 | 0.10129 | 0.11329 | 0.0000 |
| O56  | O  | 1.0000 | 0.90038 | 0.59949 | 0.11279 | 0.0000 |
| O57  | O  | 1.0000 | 0.16710 | 0.09122 | 0.38362 | 0.0000 |
| O58  | O  | 1.0000 | 0.16954 | 0.59385 | 0.38270 | 0.0000 |
| O59  | O  | 1.0000 | 0.66774 | 0.09194 | 0.38343 | 0.0000 |
| O60  | O  | 1.0000 | 0.66986 | 0.59457 | 0.38264 | 0.0000 |
| O61  | O  | 1.0000 | 0.07658 | 0.40663 | 0.11226 | 0.0000 |
| O62  | O  | 1.0000 | 0.07648 | 0.90458 | 0.11257 | 0.0000 |
| O63  | O  | 1.0000 | 0.57430 | 0.40562 | 0.11160 | 0.0000 |
| O64  | O  | 1.0000 | 0.57318 | 0.90469 | 0.11170 | 0.0000 |
| O65  | O  | 1.0000 | 0.18241 | 0.24254 | 0.44977 | 0.0000 |
| O66  | O  | 1.0000 | 0.18105 | 0.74039 | 0.44953 | 0.0000 |
| O67  | O  | 1.0000 | 0.68198 | 0.24265 | 0.44961 | 0.0000 |
| O68  | O  | 1.0000 | 0.68087 | 0.74059 | 0.44954 | 0.0000 |
| O69  | O  | 1.0000 | 0.43982 | 0.25638 | 0.04509 | 0.0000 |
| O70  | O  | 1.0000 | 0.44067 | 0.75646 | 0.04484 | 0.0000 |
| O71  | O  | 1.0000 | 0.93987 | 0.25751 | 0.04598 | 0.0000 |
| O72  | O  | 1.0000 | 0.93974 | 0.75785 | 0.04588 | 0.0000 |
| O73  | O  | 1.0000 | 0.48916 | 0.43067 | 0.44257 | 0.0000 |
| O74  | O  | 1.0000 | 0.48777 | 0.93170 | 0.44411 | 0.0000 |
| O75  | O  | 1.0000 | 0.98893 | 0.43058 | 0.44273 | 0.0000 |
| O76  | O  | 1.0000 | 0.98764 | 0.93180 | 0.44446 | 0.0000 |
| O77  | O  | 1.0000 | 0.05738 | 0.06836 | 0.05288 | 0.0000 |
| O78  | O  | 1.0000 | 0.05716 | 0.56833 | 0.05214 | 0.0000 |
| O79  | O  | 1.0000 | 0.55648 | 0.06639 | 0.05096 | 0.0000 |
| O80  | O  | 1.0000 | 0.55683 | 0.56643 | 0.05082 | 0.0000 |
| O81  | O  | 1.0000 | 0.29668 | 0.04948 | 0.44763 | 0.0000 |
| O82  | O  | 1.0000 | 0.29886 | 0.55040 | 0.44646 | 0.0000 |
| O83  | O  | 1.0000 | 0.79664 | 0.04994 | 0.44763 | 0.0000 |
| O84  | O  | 1.0000 | 0.79896 | 0.55081 | 0.44644 | 0.0000 |
| O85  | O  | 1.0000 | 0.24665 | 0.44810 | 0.04783 | 0.0000 |
| O86  | O  | 1.0000 | 0.24652 | 0.94793 | 0.04808 | 0.0000 |
| O87  | O  | 1.0000 | 0.74777 | 0.44842 | 0.04785 | 0.0000 |
| O88  | O  | 1.0000 | 0.74826 | 0.94874 | 0.04842 | 0.0000 |
| Si1  | Si | 1.0000 | 0.23285 | 0.99849 | 0.24724 | 0.0000 |
| Si2  | Si | 1.0000 | 0.23367 | 0.49885 | 0.24796 | 0.0000 |
| Si3  | Si | 1.0000 | 0.73189 | 0.99905 | 0.24723 | 0.0000 |
| Si4  | Si | 1.0000 | 0.73179 | 0.49951 | 0.24788 | 0.0000 |
| Si5  | Si | 1.0000 | 0.00319 | 0.23068 | 0.30095 | 0.0000 |
| Si6  | Si | 1.0000 | 0.00389 | 0.73366 | 0.30084 | 0.0000 |
| Si7  | Si | 1.0000 | 0.50311 | 0.23082 | 0.30097 | 0.0000 |
| Si8  | Si | 1.0000 | 0.50421 | 0.73386 | 0.30087 | 0.0000 |
| Si9  | Si | 1.0000 | 0.27133 | 0.26630 | 0.19422 | 0.0000 |
| Si10 | Si | 1.0000 | 0.26997 | 0.76421 | 0.19427 | 0.0000 |

|      |    |        |         |         |         |        |
|------|----|--------|---------|---------|---------|--------|
| Si11 | Si | 1.0000 | 0.77085 | 0.26724 | 0.19426 | 0.0000 |
| Si12 | Si | 1.0000 | 0.76951 | 0.76530 | 0.19420 | 0.0000 |
| Si13 | Si | 1.0000 | 0.26106 | 0.24356 | 0.35478 | 0.0000 |
| Si14 | Si | 1.0000 | 0.26341 | 0.74841 | 0.35463 | 0.0000 |
| Si15 | Si | 1.0000 | 0.76181 | 0.24465 | 0.35470 | 0.0000 |
| Si16 | Si | 1.0000 | 0.76427 | 0.74943 | 0.35468 | 0.0000 |
| Si17 | Si | 1.0000 | 0.01580 | 0.25323 | 0.14077 | 0.0000 |
| Si18 | Si | 1.0000 | 0.01442 | 0.75005 | 0.14075 | 0.0000 |
| Si19 | Si | 1.0000 | 0.51611 | 0.25247 | 0.14012 | 0.0000 |
| Si20 | Si | 1.0000 | 0.51504 | 0.75111 | 0.14006 | 0.0000 |
| Si21 | Si | 1.0000 | 0.31843 | 0.40629 | 0.43031 | 0.0000 |
| Si22 | Si | 1.0000 | 0.31713 | 0.90619 | 0.43107 | 0.0000 |
| Si23 | Si | 1.0000 | 0.81846 | 0.40660 | 0.43033 | 0.0000 |
| Si24 | Si | 1.0000 | 0.81728 | 0.90656 | 0.43122 | 0.0000 |
| Si25 | Si | 1.0000 | 0.41112 | 0.09145 | 0.06402 | 0.0000 |
| Si26 | Si | 1.0000 | 0.41135 | 0.59134 | 0.06380 | 0.0000 |
| Si27 | Si | 1.0000 | 0.91098 | 0.09285 | 0.06503 | 0.0000 |
| Si28 | Si | 1.0000 | 0.91074 | 0.59235 | 0.06453 | 0.0000 |
| Si29 | Si | 1.0000 | 0.15671 | 0.07805 | 0.43165 | 0.0000 |
| Si30 | Si | 1.0000 | 0.15811 | 0.57790 | 0.43067 | 0.0000 |
| Si31 | Si | 1.0000 | 0.65679 | 0.07837 | 0.43146 | 0.0000 |
| Si32 | Si | 1.0000 | 0.65824 | 0.57829 | 0.43061 | 0.0000 |
| Si33 | Si | 1.0000 | 0.07930 | 0.42117 | 0.06426 | 0.0000 |
| Si34 | Si | 1.0000 | 0.07922 | 0.92080 | 0.06462 | 0.0000 |
| Si35 | Si | 1.0000 | 0.57908 | 0.41991 | 0.06361 | 0.0000 |
| Si36 | Si | 1.0000 | 0.57908 | 0.91994 | 0.06368 | 0.0000 |
| C1   | C  | 1.0000 | 0.45538 | 0.19865 | 0.52785 | 0.0000 |
| C2   | C  | 1.0000 | 0.95458 | 0.19873 | 0.52792 | 0.0000 |
| C3   | C  | 1.0000 | 0.49234 | 0.78576 | 0.52950 | 0.0000 |
| C4   | C  | 1.0000 | 0.99251 | 0.78603 | 0.52957 | 0.0000 |
| C5   | C  | 1.0000 | 0.72885 | 0.71043 | 0.96455 | 0.0000 |
| C6   | C  | 1.0000 | 0.29531 | 0.75924 | 0.96737 | 0.0000 |
| C7   | C  | 1.0000 | 0.70068 | 0.22607 | 0.96379 | 0.0000 |
| C8   | C  | 1.0000 | 0.29721 | 0.28086 | 0.96801 | 0.0000 |

**rd-CO2 (optB86b-vdW)**

\_cell\_length\_a 9.80  
\_cell\_length\_b 9.80  
\_cell\_length\_c 34  
\_cell\_angle\_alpha 90  
\_cell\_angle\_beta 90  
\_cell\_angle\_gamma 120  
\_symmetry\_space\_group\_H-M 'P1'  
\_symmetry\_Int\_Tables\_number '1'  
\_symmetry\_cell\_setting 'triclinic'  
loop\_  
\_symmetry\_equiv\_pos\_as\_xyz  
x,y,z

loop\_

\_atom\_site\_label  
\_atom\_site\_type\_symbol  
\_atom\_site\_occupancy  
\_atom\_site\_fract\_x  
\_atom\_site\_fract\_y  
\_atom\_site\_fract\_z  
\_atom\_site\_U\_iso\_or\_equiv  
O1 O 1.0000 0.48224 0.29667 0.52865 0.0000  
O2 O 1.0000 0.50952 0.07159 0.53092 0.0000  
O3 O 1.0000 0.11611 0.37432 0.27370 0.0000  
O4 O 1.0000 0.05533 0.90758 0.26993 0.0000  
O5 O 1.0000 0.61693 0.39055 0.27685 0.0000  
O6 O 1.0000 0.54886 0.89976 0.26853 0.0000  
O7 O 1.0000 0.17744 0.10021 0.21169 0.0000  
O8 O 1.0000 0.23531 0.59973 0.22279 0.0000  
O9 O 1.0000 0.68399 0.08059 0.20853 0.0000  
O10 O 1.0000 0.73448 0.57979 0.21717 0.0000  
O11 O 1.0000 0.36422 0.10679 0.27124 0.0000  
O12 O 1.0000 0.41568 0.59707 0.28291 0.0000  
O13 O 1.0000 0.85800 0.09446 0.27217 0.0000  
O14 O 1.0000 0.92041 0.60360 0.27951 0.0000  
O15 O 1.0000 0.34823 0.40317 0.22518 0.0000  
O16 O 1.0000 0.25939 0.88076 0.22087 0.0000  
O17 O 1.0000 0.83218 0.37667 0.22944 0.0000  
O18 O 1.0000 0.75533 0.85756 0.22493 0.0000  
O19 O 1.0000 0.06988 0.16747 0.32863 0.0000  
O20 O 1.0000 0.07677 0.80207 0.34036 0.0000  
O21 O 1.0000 0.57302 0.17085 0.32800 0.0000  
O22 O 1.0000 0.58233 0.80962 0.34004 0.0000  
O23 O 1.0000 0.45262 0.25644 0.17792 0.0000  
O24 O 1.0000 0.40364 0.80007 0.16700 0.0000  
O25 O 1.0000 0.96111 0.26710 0.17825 0.0000  
O26 O 1.0000 0.90527 0.80251 0.16664 0.0000  
O27 O 1.0000 0.38453 0.29792 0.32834 0.0000  
O28 O 1.0000 0.30241 0.75753 0.31728 0.0000  
O29 O 1.0000 0.88742 0.30026 0.32616 0.0000  
O30 O 1.0000 0.80159 0.75478 0.31669 0.0000  
O31 O 1.0000 0.22865 0.31071 0.15332 0.0000  
O32 O 1.0000 0.08791 0.66968 0.16795 0.0000  
O33 O 1.0000 0.72571 0.30572 0.15539 0.0000  
O34 O 1.0000 0.58974 0.67175 0.16667 0.0000  
O35 O 1.0000 0.24449 0.38293 0.38261 0.0000  
O36 O 1.0000 0.34072 0.90233 0.38568 0.0000  
O37 O 1.0000 0.75203 0.38760 0.38127 0.0000  
O38 O 1.0000 0.84417 0.90000 0.38547 0.0000

|      |    |        |         |         |         |        |
|------|----|--------|---------|---------|---------|--------|
| O39  | O  | 1.0000 | 0.48424 | 0.10983 | 0.11244 | 0.0000 |
| O40  | O  | 1.0000 | 0.38365 | 0.60898 | 0.10901 | 0.0000 |
| O41  | O  | 1.0000 | 0.98067 | 0.11221 | 0.11267 | 0.0000 |
| O42  | O  | 1.0000 | 0.88567 | 0.60712 | 0.10940 | 0.0000 |
| O43  | O  | 1.0000 | 0.21430 | 0.10353 | 0.38601 | 0.0000 |
| O44  | O  | 1.0000 | 0.12534 | 0.60729 | 0.38293 | 0.0000 |
| O45  | O  | 1.0000 | 0.72070 | 0.10766 | 0.38483 | 0.0000 |
| O46  | O  | 1.0000 | 0.62144 | 0.60777 | 0.38213 | 0.0000 |
| O47  | O  | 1.0000 | 0.05802 | 0.40639 | 0.10881 | 0.0000 |
| O48  | O  | 1.0000 | 0.13473 | 0.88671 | 0.11350 | 0.0000 |
| O49  | O  | 1.0000 | 0.55912 | 0.40357 | 0.10976 | 0.0000 |
| O50  | O  | 1.0000 | 0.63203 | 0.88820 | 0.11290 | 0.0000 |
| O51  | O  | 1.0000 | 0.22825 | 0.24986 | 0.45295 | 0.0000 |
| O52  | O  | 1.0000 | 0.22866 | 0.74610 | 0.45291 | 0.0000 |
| O53  | O  | 1.0000 | 0.72966 | 0.25143 | 0.45169 | 0.0000 |
| O54  | O  | 1.0000 | 0.72687 | 0.74421 | 0.45239 | 0.0000 |
| O55  | O  | 1.0000 | 0.51557 | 0.24797 | 0.04251 | 0.0000 |
| O56  | O  | 1.0000 | 0.51985 | 0.75293 | 0.04231 | 0.0000 |
| O57  | O  | 1.0000 | 0.01399 | 0.24716 | 0.04219 | 0.0000 |
| O58  | O  | 1.0000 | 0.01902 | 0.75507 | 0.04285 | 0.0000 |
| O59  | O  | 1.0000 | 0.41927 | 0.55760 | 0.44165 | 0.0000 |
| O60  | O  | 1.0000 | 0.53891 | 0.94048 | 0.44429 | 0.0000 |
| O61  | O  | 1.0000 | 0.92048 | 0.55967 | 0.44148 | 0.0000 |
| O62  | O  | 1.0000 | 0.03722 | 0.93850 | 0.44595 | 0.0000 |
| O63  | O  | 1.0000 | 0.13693 | 0.06243 | 0.05425 | 0.0000 |
| O64  | O  | 1.0000 | 0.90032 | 0.44375 | 0.04916 | 0.0000 |
| O65  | O  | 1.0000 | 0.63631 | 0.06070 | 0.05284 | 0.0000 |
| O66  | O  | 1.0000 | 0.39964 | 0.44157 | 0.05020 | 0.0000 |
| O67  | O  | 1.0000 | 0.34553 | 0.05629 | 0.44964 | 0.0000 |
| O68  | O  | 1.0000 | 0.10843 | 0.43707 | 0.44425 | 0.0000 |
| O69  | O  | 1.0000 | 0.84588 | 0.05574 | 0.44879 | 0.0000 |
| O70  | O  | 1.0000 | 0.60860 | 0.43593 | 0.44237 | 0.0000 |
| O71  | O  | 1.0000 | 0.20854 | 0.55770 | 0.04467 | 0.0000 |
| O72  | O  | 1.0000 | 0.32548 | 0.93953 | 0.05185 | 0.0000 |
| O73  | O  | 1.0000 | 0.70789 | 0.55879 | 0.04583 | 0.0000 |
| O74  | O  | 1.0000 | 0.82584 | 0.93877 | 0.05205 | 0.0000 |
| Si1  | Si | 1.0000 | 0.21408 | 0.99761 | 0.24352 | 0.0000 |
| Si2  | Si | 1.0000 | 0.27751 | 0.49289 | 0.25106 | 0.0000 |
| Si3  | Si | 1.0000 | 0.71224 | 0.98332 | 0.24355 | 0.0000 |
| Si4  | Si | 1.0000 | 0.77487 | 0.48772 | 0.25073 | 0.0000 |
| Si5  | Si | 1.0000 | 0.98257 | 0.23476 | 0.30010 | 0.0000 |
| Si6  | Si | 1.0000 | 0.96565 | 0.76786 | 0.30195 | 0.0000 |
| Si7  | Si | 1.0000 | 0.48412 | 0.24150 | 0.30114 | 0.0000 |
| Si8  | Si | 1.0000 | 0.46489 | 0.76718 | 0.30261 | 0.0000 |
| Si9  | Si | 1.0000 | 0.30028 | 0.26906 | 0.19162 | 0.0000 |
| Si10 | Si | 1.0000 | 0.24771 | 0.73814 | 0.19465 | 0.0000 |
| Si11 | Si | 1.0000 | 0.79888 | 0.25925 | 0.19250 | 0.0000 |
| Si12 | Si | 1.0000 | 0.74650 | 0.72904 | 0.19377 | 0.0000 |
| Si13 | Si | 1.0000 | 0.22842 | 0.23794 | 0.35546 | 0.0000 |
| Si14 | Si | 1.0000 | 0.21277 | 0.76749 | 0.35627 | 0.0000 |
| Si15 | Si | 1.0000 | 0.73351 | 0.24126 | 0.35418 | 0.0000 |
| Si16 | Si | 1.0000 | 0.71422 | 0.76829 | 0.35578 | 0.0000 |
| Si17 | Si | 1.0000 | 0.05588 | 0.27461 | 0.13853 | 0.0000 |
| Si18 | Si | 1.0000 | 0.00325 | 0.74167 | 0.14028 | 0.0000 |
| Si19 | Si | 1.0000 | 0.55469 | 0.26963 | 0.13915 | 0.0000 |
| Si20 | Si | 1.0000 | 0.50221 | 0.74286 | 0.13986 | 0.0000 |
| Si21 | Si | 1.0000 | 0.24898 | 0.40561 | 0.43051 | 0.0000 |
| Si22 | Si | 1.0000 | 0.36485 | 0.90952 | 0.43355 | 0.0000 |
| Si23 | Si | 1.0000 | 0.75167 | 0.40783 | 0.42916 | 0.0000 |
| Si24 | Si | 1.0000 | 0.86441 | 0.90783 | 0.43349 | 0.0000 |

|      |    |        |         |         |         |        |
|------|----|--------|---------|---------|---------|--------|
| Si25 | Si | 1.0000 | 0.49311 | 0.09102 | 0.06467 | 0.0000 |
| Si26 | Si | 1.0000 | 0.37828 | 0.59200 | 0.06115 | 0.0000 |
| Si27 | Si | 1.0000 | 0.99208 | 0.09160 | 0.06506 | 0.0000 |
| Si28 | Si | 1.0000 | 0.87858 | 0.59285 | 0.06144 | 0.0000 |
| Si29 | Si | 1.0000 | 0.20762 | 0.08877 | 0.43394 | 0.0000 |
| Si30 | Si | 1.0000 | 0.09462 | 0.58907 | 0.43064 | 0.0000 |
| Si31 | Si | 1.0000 | 0.71009 | 0.09026 | 0.43276 | 0.0000 |
| Si32 | Si | 1.0000 | 0.59272 | 0.58790 | 0.42990 | 0.0000 |
| Si33 | Si | 1.0000 | 0.04240 | 0.41213 | 0.06084 | 0.0000 |
| Si34 | Si | 1.0000 | 0.15416 | 0.90987 | 0.06560 | 0.0000 |
| Si35 | Si | 1.0000 | 0.54268 | 0.41140 | 0.06184 | 0.0000 |
| Si36 | Si | 1.0000 | 0.65360 | 0.90886 | 0.06499 | 0.0000 |
| C1   | C  | 1.0000 | 0.49588 | 0.18417 | 0.52963 | 0.0000 |

**rd-CO2-f (optB86b-vdW)**

\_cell\_length\_a 9.80  
\_cell\_length\_b 9.80  
\_cell\_length\_c 34  
\_cell\_angle\_alpha 90  
\_cell\_angle\_beta 90  
\_cell\_angle\_gamma 120  
\_symmetry\_space\_group\_H-M 'P1'  
\_symmetry\_Int\_Tables\_number '1'  
\_symmetry\_cell\_setting 'triclinic'  
loop\_  
\_symmetry\_equiv\_pos\_as\_xyz  
x,y,z

loop\_

\_atom\_site\_label  
\_atom\_site\_type\_symbol  
\_atom\_site\_occupancy  
\_atom\_site\_fract\_x  
\_atom\_site\_fract\_y  
\_atom\_site\_fract\_z  
\_atom\_site\_U\_iso\_or\_equiv  
O1 O 1.0000 0.70963 0.89771 0.96326 0.0000  
O2 O 1.0000 0.77488 0.69707 0.96227 0.0000  
O3 O 1.0000 0.22096 0.80892 0.96440 0.0000  
O4 O 1.0000 0.31248 0.62907 0.95838 0.0000  
O5 O 1.0000 0.64227 0.19163 0.96370 0.0000  
O6 O 1.0000 0.91189 0.38167 0.96180 0.0000  
O7 O 1.0000 0.10853 0.13284 0.96361 0.0000  
O8 O 1.0000 0.37681 0.32729 0.96414 0.0000  
O9 O 1.0000 0.52174 0.08356 0.53047 0.0000  
O10 O 1.0000 0.46310 0.28871 0.52812 0.0000  
O11 O 1.0000 0.93881 0.34295 0.52964 0.0000  
O12 O 1.0000 0.02203 0.15580 0.53252 0.0000  
O13 O 1.0000 0.32974 0.60702 0.52940 0.0000  
O14 O 1.0000 0.59862 0.79971 0.53050 0.0000  
O15 O 1.0000 0.12639 0.85734 0.53175 0.0000  
O16 O 1.0000 0.86318 0.65131 0.52856 0.0000  
O17 O 1.0000 0.11505 0.37363 0.27345 0.0000  
O18 O 1.0000 0.05530 0.90848 0.27055 0.0000  
O19 O 1.0000 0.61714 0.39015 0.27653 0.0000  
O20 O 1.0000 0.54783 0.89919 0.26887 0.0000  
O21 O 1.0000 0.17674 0.09867 0.21192 0.0000  
O22 O 1.0000 0.23492 0.59800 0.22223 0.0000  
O23 O 1.0000 0.68312 0.08122 0.20925 0.0000  
O24 O 1.0000 0.73438 0.58053 0.21712 0.0000  
O25 O 1.0000 0.36432 0.10655 0.27143 0.0000  
O26 O 1.0000 0.41448 0.59630 0.28280 0.0000  
O27 O 1.0000 0.85677 0.09397 0.27292 0.0000  
O28 O 1.0000 0.92025 0.60401 0.27946 0.0000  
O29 O 1.0000 0.34780 0.40183 0.22522 0.0000  
O30 O 1.0000 0.25773 0.87850 0.22173 0.0000  
O31 O 1.0000 0.83384 0.37853 0.22910 0.0000  
O32 O 1.0000 0.75518 0.85829 0.22532 0.0000  
O33 O 1.0000 0.07104 0.16931 0.32892 0.0000  
O34 O 1.0000 0.07468 0.80004 0.34077 0.0000  
O35 O 1.0000 0.57390 0.17189 0.32802 0.0000  
O36 O 1.0000 0.58009 0.80755 0.34028 0.0000  
O37 O 1.0000 0.45194 0.25400 0.17829 0.0000  
O38 O 1.0000 0.40529 0.80319 0.16755 0.0000

|      |    |        |         |         |         |        |
|------|----|--------|---------|---------|---------|--------|
| O39  | O  | 1.0000 | 0.95965 | 0.26365 | 0.17841 | 0.0000 |
| O40  | O  | 1.0000 | 0.90667 | 0.80500 | 0.16718 | 0.0000 |
| O41  | O  | 1.0000 | 0.38554 | 0.29883 | 0.32828 | 0.0000 |
| O42  | O  | 1.0000 | 0.30054 | 0.75607 | 0.31727 | 0.0000 |
| O43  | O  | 1.0000 | 0.88845 | 0.30178 | 0.32649 | 0.0000 |
| O44  | O  | 1.0000 | 0.80043 | 0.75445 | 0.31664 | 0.0000 |
| O45  | O  | 1.0000 | 0.22775 | 0.30819 | 0.15341 | 0.0000 |
| O46  | O  | 1.0000 | 0.08918 | 0.67167 | 0.16774 | 0.0000 |
| O47  | O  | 1.0000 | 0.72502 | 0.30383 | 0.15537 | 0.0000 |
| O48  | O  | 1.0000 | 0.59082 | 0.67406 | 0.16671 | 0.0000 |
| O49  | O  | 1.0000 | 0.24772 | 0.38493 | 0.38272 | 0.0000 |
| O50  | O  | 1.0000 | 0.33981 | 0.90133 | 0.38560 | 0.0000 |
| O51  | O  | 1.0000 | 0.75232 | 0.38785 | 0.38161 | 0.0000 |
| O52  | O  | 1.0000 | 0.84374 | 0.90071 | 0.38527 | 0.0000 |
| O53  | O  | 1.0000 | 0.48306 | 0.10823 | 0.11251 | 0.0000 |
| O54  | O  | 1.0000 | 0.38189 | 0.61083 | 0.10970 | 0.0000 |
| O55  | O  | 1.0000 | 0.98005 | 0.11074 | 0.11245 | 0.0000 |
| O56  | O  | 1.0000 | 0.88363 | 0.60827 | 0.11005 | 0.0000 |
| O57  | O  | 1.0000 | 0.21536 | 0.10455 | 0.38611 | 0.0000 |
| O58  | O  | 1.0000 | 0.12521 | 0.60583 | 0.38305 | 0.0000 |
| O59  | O  | 1.0000 | 0.71978 | 0.10712 | 0.38473 | 0.0000 |
| O60  | O  | 1.0000 | 0.62221 | 0.60726 | 0.38214 | 0.0000 |
| O61  | O  | 1.0000 | 0.05674 | 0.40477 | 0.10933 | 0.0000 |
| O62  | O  | 1.0000 | 0.13348 | 0.88798 | 0.11334 | 0.0000 |
| O63  | O  | 1.0000 | 0.55698 | 0.40200 | 0.11036 | 0.0000 |
| O64  | O  | 1.0000 | 0.63166 | 0.88939 | 0.11283 | 0.0000 |
| O65  | O  | 1.0000 | 0.23051 | 0.25096 | 0.45302 | 0.0000 |
| O66  | O  | 1.0000 | 0.22884 | 0.74529 | 0.45290 | 0.0000 |
| O67  | O  | 1.0000 | 0.72832 | 0.25001 | 0.45170 | 0.0000 |
| O68  | O  | 1.0000 | 0.72846 | 0.74499 | 0.45211 | 0.0000 |
| O69  | O  | 1.0000 | 0.51198 | 0.24732 | 0.04299 | 0.0000 |
| O70  | O  | 1.0000 | 0.51744 | 0.75179 | 0.04263 | 0.0000 |
| O71  | O  | 1.0000 | 0.01209 | 0.24749 | 0.04234 | 0.0000 |
| O72  | O  | 1.0000 | 0.01594 | 0.75351 | 0.04317 | 0.0000 |
| O73  | O  | 1.0000 | 0.42129 | 0.55911 | 0.44195 | 0.0000 |
| O74  | O  | 1.0000 | 0.53831 | 0.93878 | 0.44420 | 0.0000 |
| O75  | O  | 1.0000 | 0.92125 | 0.55883 | 0.44179 | 0.0000 |
| O76  | O  | 1.0000 | 0.03764 | 0.93927 | 0.44581 | 0.0000 |
| O77  | O  | 1.0000 | 0.13540 | 0.06186 | 0.05368 | 0.0000 |
| O78  | O  | 1.0000 | 0.89622 | 0.44209 | 0.05035 | 0.0000 |
| O79  | O  | 1.0000 | 0.63468 | 0.06062 | 0.05262 | 0.0000 |
| O80  | O  | 1.0000 | 0.39534 | 0.44026 | 0.05145 | 0.0000 |
| O81  | O  | 1.0000 | 0.34617 | 0.05594 | 0.44956 | 0.0000 |
| O82  | O  | 1.0000 | 0.10956 | 0.43621 | 0.44436 | 0.0000 |
| O83  | O  | 1.0000 | 0.84600 | 0.05648 | 0.44867 | 0.0000 |
| O84  | O  | 1.0000 | 0.60924 | 0.43623 | 0.44271 | 0.0000 |
| O85  | O  | 1.0000 | 0.20563 | 0.55852 | 0.04550 | 0.0000 |
| O86  | O  | 1.0000 | 0.32366 | 0.93828 | 0.05186 | 0.0000 |
| O87  | O  | 1.0000 | 0.70439 | 0.55823 | 0.04665 | 0.0000 |
| O88  | O  | 1.0000 | 0.82409 | 0.93824 | 0.05179 | 0.0000 |
| Si1  | Si | 1.0000 | 0.21358 | 0.99693 | 0.24395 | 0.0000 |
| Si2  | Si | 1.0000 | 0.27677 | 0.49189 | 0.25087 | 0.0000 |
| Si3  | Si | 1.0000 | 0.71157 | 0.98347 | 0.24409 | 0.0000 |
| Si4  | Si | 1.0000 | 0.77523 | 0.48828 | 0.25053 | 0.0000 |
| Si5  | Si | 1.0000 | 0.98271 | 0.23534 | 0.30038 | 0.0000 |
| Si6  | Si | 1.0000 | 0.96477 | 0.76749 | 0.30218 | 0.0000 |
| Si7  | Si | 1.0000 | 0.48471 | 0.24191 | 0.30109 | 0.0000 |
| Si8  | Si | 1.0000 | 0.46330 | 0.76590 | 0.30274 | 0.0000 |
| Si9  | Si | 1.0000 | 0.29970 | 0.26725 | 0.19178 | 0.0000 |
| Si10 | Si | 1.0000 | 0.24783 | 0.73842 | 0.19479 | 0.0000 |

|      |    |        |         |         |         |        |
|------|----|--------|---------|---------|---------|--------|
| Si11 | Si | 1.0000 | 0.79866 | 0.25866 | 0.19261 | 0.0000 |
| Si12 | Si | 1.0000 | 0.74700 | 0.73059 | 0.19399 | 0.0000 |
| Si13 | Si | 1.0000 | 0.22998 | 0.23920 | 0.35558 | 0.0000 |
| Si14 | Si | 1.0000 | 0.21144 | 0.76600 | 0.35636 | 0.0000 |
| Si15 | Si | 1.0000 | 0.73394 | 0.24209 | 0.35433 | 0.0000 |
| Si16 | Si | 1.0000 | 0.71347 | 0.76794 | 0.35579 | 0.0000 |
| Si17 | Si | 1.0000 | 0.05492 | 0.27219 | 0.13869 | 0.0000 |
| Si18 | Si | 1.0000 | 0.00329 | 0.74356 | 0.14049 | 0.0000 |
| Si19 | Si | 1.0000 | 0.55361 | 0.26764 | 0.13938 | 0.0000 |
| Si20 | Si | 1.0000 | 0.50256 | 0.74512 | 0.14018 | 0.0000 |
| Si21 | Si | 1.0000 | 0.25131 | 0.40661 | 0.43061 | 0.0000 |
| Si22 | Si | 1.0000 | 0.36443 | 0.90881 | 0.43344 | 0.0000 |
| Si23 | Si | 1.0000 | 0.75193 | 0.40748 | 0.42956 | 0.0000 |
| Si24 | Si | 1.0000 | 0.86502 | 0.90891 | 0.43326 | 0.0000 |
| Si25 | Si | 1.0000 | 0.49107 | 0.09022 | 0.06467 | 0.0000 |
| Si26 | Si | 1.0000 | 0.37548 | 0.59190 | 0.06190 | 0.0000 |
| Si27 | Si | 1.0000 | 0.99069 | 0.09111 | 0.06476 | 0.0000 |
| Si28 | Si | 1.0000 | 0.87532 | 0.59239 | 0.06212 | 0.0000 |
| Si29 | Si | 1.0000 | 0.20875 | 0.08942 | 0.43408 | 0.0000 |
| Si30 | Si | 1.0000 | 0.09494 | 0.58775 | 0.43076 | 0.0000 |
| Si31 | Si | 1.0000 | 0.70907 | 0.08945 | 0.43263 | 0.0000 |
| Si32 | Si | 1.0000 | 0.59433 | 0.58828 | 0.42990 | 0.0000 |
| Si33 | Si | 1.0000 | 0.03964 | 0.41159 | 0.06147 | 0.0000 |
| Si34 | Si | 1.0000 | 0.15221 | 0.90911 | 0.06536 | 0.0000 |
| Si35 | Si | 1.0000 | 0.53922 | 0.41039 | 0.06251 | 0.0000 |
| Si36 | Si | 1.0000 | 0.65200 | 0.90894 | 0.06488 | 0.0000 |
| C1   | C  | 1.0000 | 0.49224 | 0.18610 | 0.52917 | 0.0000 |
| C2   | C  | 1.0000 | 0.98056 | 0.24944 | 0.53097 | 0.0000 |
| C3   | C  | 1.0000 | 0.46428 | 0.70358 | 0.52988 | 0.0000 |
| C4   | C  | 1.0000 | 0.99470 | 0.75433 | 0.53008 | 0.0000 |
| C5   | C  | 1.0000 | 0.74232 | 0.79732 | 0.96286 | 0.0000 |
| C6   | C  | 1.0000 | 0.26655 | 0.71889 | 0.96151 | 0.0000 |
| C7   | C  | 1.0000 | 0.77695 | 0.28646 | 0.96284 | 0.0000 |
| C8   | C  | 1.0000 | 0.24278 | 0.23018 | 0.96396 | 0.0000 |
